# Supplementary material
Source: Copernicus journal article supplement (doi:10.5194/gmd-19-3801-2026)
Supplement: Supplementary file 1 [file gmd-19-3801-2026-supplement.pdf]

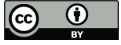

*Supplement of*

## **Advancing the BRAMS wildfire–atmosphere modelling system: application to an extreme wildfire event**

**Isilda Cunha Menezes et al.**

*Correspondence to:* Isilda Cunha Menezes (isildacm@ua.pt) and Saulo R. Freitas (saulo.freitas@inpe.br)

The copyright of individual parts of the supplement might differ from the article licence.

**Table S1: Diagnostic statistics for the Sertã wildfire period comparing simulated Smoke Optical Depth (SOD) and MERRA-2 Aerosol Optical Depth (AOD). The table lists the results for the BASELINE phase, for each simulation scenario, spatial mask (ALL or percentile thresholds P70), and background-subtraction condition (background, TRUE = background removed; FALSE = absolute values), the corresponding mean SOD and AOD, bias (SOD – AOD), mean absolute error (MAE), root-mean-square error (RMSE), Pearson correlation coefficient (r) and Spearman’s rank correlation coefficient ( $\rho$ ), and coefficient of determination ( $R^2$ ) and linear-regression slope and intercept between SOD and AOD.**

| phase | scenario   | mask | background | Mean SOD | Mean AOD | Bias   | MAE    | RMSE   | r     | $\rho$ | $R^2$ | slope  | intercept |
|-------|------------|------|------------|----------|----------|--------|--------|--------|-------|--------|-------|--------|-----------|
| mixed | BASE       | ALL  | FALSE      | 27.28    | 1.17     | 26.10  | 27.75  | 100.75 | 0.01  | 0.42   | 0.00  | 0.000  | 1.17      |
| mixed | BASE       | ALL  | TRUE       | 27.28    | 0.57     | 26.71  | 27.40  | 100.88 | 0.06  | 0.55   | 0.00  | 0.000  | 0.56      |
| mixed | BASE       | P70  | FALSE      | 90.17    | 1.63     | 88.54  | 89.97  | 183.95 | -0.32 | -0.41  | 0.10  | -0.001 | 1.76      |
| mixed | BASE       | P70  | TRUE       | 90.17    | 1.00     | 89.16  | 90.02  | 184.19 | -0.28 | -0.30  | 0.08  | -0.001 | 1.10      |
| mixed | BASE       | P80  | FALSE      | 128.27   | 1.63     | 126.63 | 127.90 | 224.68 | -0.41 | -0.46  | 0.17  | -0.002 | 1.84      |
| mixed | BASE       | P80  | TRUE       | 128.27   | 1.01     | 127.26 | 128.00 | 224.97 | -0.37 | -0.37  | 0.13  | -0.001 | 1.15      |
| mixed | BASE       | P90  | FALSE      | 200.70   | 1.57     | 199.13 | 200.11 | 305.70 | -0.49 | -0.47  | 0.24  | -0.001 | 1.84      |
| mixed | BASE       | P90  | TRUE       | 200.70   | 0.94     | 199.76 | 200.30 | 306.03 | -0.43 | -0.37  | 0.18  | -0.001 | 1.12      |
| mixed | ABSORBING  | ALL  | FALSE      | 25.35    | 1.17     | 24.17  | 25.82  | 93.53  | 0.01  | 0.42   | 0.00  | 0.000  | 1.17      |
| mixed | ABSORBING  | ALL  | TRUE       | 25.35    | 0.57     | 24.78  | 25.48  | 93.66  | 0.06  | 0.56   | 0.00  | 0.000  | 0.56      |
| mixed | ABSORBING  | P70  | FALSE      | 83.80    | 1.63     | 82.18  | 83.62  | 170.76 | -0.32 | -0.41  | 0.10  | -0.002 | 1.76      |
| mixed | ABSORBING  | P70  | TRUE       | 83.80    | 1.00     | 82.80  | 83.66  | 171.01 | -0.28 | -0.30  | 0.08  | -0.001 | 1.10      |
| mixed | ABSORBING  | P80  | FALSE      | 119.26   | 1.63     | 117.63 | 118.89 | 208.58 | -0.41 | -0.46  | 0.16  | -0.002 | 1.84      |
| mixed | ABSORBING  | P80  | TRUE       | 119.26   | 1.01     | 118.25 | 119.00 | 208.87 | -0.37 | -0.37  | 0.13  | -0.001 | 1.15      |
| mixed | ABSORBING  | P90  | FALSE      | 186.74   | 1.57     | 185.17 | 186.16 | 283.91 | -0.48 | -0.46  | 0.23  | -0.001 | 1.84      |
| mixed | ABSORBING  | P90  | TRUE       | 186.74   | 0.94     | 185.80 | 186.34 | 284.24 | -0.43 | -0.37  | 0.18  | -0.001 | 1.13      |
| mixed | WIDE_SIGMA | ALL  | FALSE      | 18.15    | 1.17     | 16.98  | 18.65  | 66.56  | 0.02  | 0.42   | 0.00  | 0.000  | 1.17      |
| mixed | WIDE_SIGMA | ALL  | TRUE       | 18.15    | 0.57     | 17.58  | 18.30  | 66.69  | 0.06  | 0.56   | 0.00  | 0.001  | 0.56      |
| mixed | WIDE_SIGMA | P70  | FALSE      | 60.01    | 1.63     | 58.38  | 59.86  | 121.51 | -0.32 | -0.40  | 0.10  | -0.002 | 1.76      |
| mixed | WIDE_SIGMA | P70  | TRUE       | 60.01    | 1.00     | 59.01  | 59.89  | 121.75 | -0.28 | -0.30  | 0.08  | -0.002 | 1.10      |
| mixed | WIDE_SIGMA | P80  | FALSE      | 85.43    | 1.63     | 83.80  | 85.10  | 148.43 | -0.41 | -0.46  | 0.17  | -0.002 | 1.84      |
| mixed | WIDE_SIGMA | P80  | TRUE       | 85.43    | 1.01     | 84.42  | 85.19  | 148.72 | -0.37 | -0.37  | 0.14  | -0.002 | 1.16      |
| mixed | WIDE_SIGMA | P90  | FALSE      | 134.06   | 1.57     | 132.49 | 133.50 | 202.18 | -0.49 | -0.47  | 0.24  | -0.002 | 1.84      |
| mixed | WIDE_SIGMA | P90  | TRUE       | 134.06   | 0.94     | 133.11 | 133.68 | 202.51 | -0.43 | -0.37  | 0.19  | -0.001 | 1.13      |
| mixed | SMALL_RG   | ALL  | FALSE      | 27.35    | 1.17     | 26.17  | 27.82  | 101.58 | 0.01  | 0.41   | 0.00  | 0.000  | 1.17      |
| mixed | SMALL_RG   | ALL  | TRUE       | 27.35    | 0.57     | 26.78  | 27.48  | 101.71 | 0.06  | 0.55   | 0.00  | 0.000  | 0.56      |
| mixed | SMALL_RG   | P70  | FALSE      | 90.37    | 1.63     | 88.75  | 90.21  | 185.45 | -0.32 | -0.41  | 0.10  | -0.001 | 1.76      |
| mixed | SMALL_RG   | P70  | TRUE       | 90.37    | 1.00     | 89.37  | 90.24  | 185.70 | -0.28 | -0.31  | 0.08  | -0.001 | 1.10      |
| mixed | SMALL_RG   | P80  | FALSE      | 128.48   | 1.63     | 126.85 | 128.13 | 226.51 | -0.40 | -0.47  | 0.16  | -0.002 | 1.83      |
| mixed | SMALL_RG   | P80  | TRUE       | 128.48   | 1.01     | 127.47 | 128.23 | 226.79 | -0.37 | -0.37  | 0.13  | -0.001 | 1.15      |

|       |          |     |       |        |      |        |        |        |       |       |      |        |      |
|-------|----------|-----|-------|--------|------|--------|--------|--------|-------|-------|------|--------|------|
| mixed | SMALL_RG | P90 | FALSE | 200.57 | 1.57 | 199.00 | 200.00 | 307.98 | -0.48 | -0.46 | 0.23 | -0.001 | 1.83 |
| mixed | SMALL_RG | P90 | TRUE  | 200.57 | 0.94 | 199.62 | 200.18 | 308.31 | -0.42 | -0.37 | 0.18 | -0.001 | 1.12 |
| mixed | LARGE_RG | ALL | FALSE | 25.53  | 1.17 | 24.35  | 26.00  | 93.92  | 0.01  | 0.42  | 0.00 | 0.000  | 1.17 |
| mixed | LARGE_RG | ALL | TRUE  | 25.53  | 0.57 | 24.96  | 25.66  | 94.06  | 0.06  | 0.56  | 0.00 | 0.000  | 0.56 |
| mixed | LARGE_RG | P70 | FALSE | 84.40  | 1.63 | 82.77  | 84.20  | 171.48 | -0.32 | -0.40 | 0.10 | -0.002 | 1.76 |
| mixed | LARGE_RG | P70 | TRUE  | 84.40  | 1.00 | 83.40  | 84.24  | 171.73 | -0.28 | -0.30 | 0.08 | -0.001 | 1.10 |
| mixed | LARGE_RG | P80 | FALSE | 120.12 | 1.63 | 118.49 | 119.74 | 209.47 | -0.41 | -0.46 | 0.17 | -0.002 | 1.84 |
| mixed | LARGE_RG | P80 | TRUE  | 120.12 | 1.01 | 119.11 | 119.85 | 209.75 | -0.37 | -0.37 | 0.14 | -0.001 | 1.16 |
| mixed | LARGE_RG | P90 | FALSE | 188.34 | 1.57 | 186.77 | 187.75 | 285.19 | -0.49 | -0.47 | 0.24 | -0.001 | 1.84 |
| mixed | LARGE_RG | P90 | TRUE  | 188.34 | 0.94 | 187.40 | 187.94 | 285.52 | -0.43 | -0.37 | 0.19 | -0.001 | 1.13 |

**Table S2: Diagnostic statistics for the Sertã wildfire period comparing simulated Smoke Optical Depth (SOD) and MERRA-2 Aerosol Optical Depth (AOD). The table lists the results for the CONSERVATIVE phase, for each simulation scenario, spatial mask (ALL or percentile thresholds P70), and background-subtraction condition (background, TRUE = background removed; FALSE = absolute values), the corresponding mean SOD and AOD, bias (SOD – AOD), mean absolute error (MAE), root-mean-square error (RMSE), Pearson correlation coefficient (r) and Spearman’s rank correlation coefficient ( $\rho$ ), and coefficient of determination ( $R^2$ ) and linear-regression slope and intercept between SOD and AOD.**

| phase | scenario  | mask | background | Mean SOD | Mean AOD | Bias   | MAE    | RMSE   | r     | $\rho$ | $R^2$ | slope  | intercept |
|-------|-----------|------|------------|----------|----------|--------|--------|--------|-------|--------|-------|--------|-----------|
| mixed | BASE      | ALL  | FALSE      | 29.52    | 1.17     | 28.35  | 29.99  | 109.69 | 0.01  | 0.41   | 0.00  | 0.000  | 1.17      |
| mixed | BASE      | ALL  | TRUE       | 29.52    | 0.57     | 28.96  | 29.65  | 109.82 | 0.06  | 0.55   | 0.00  | 0.000  | 0.56      |
| mixed | BASE      | P70  | FALSE      | 97.59    | 1.63     | 95.96  | 97.40  | 200.27 | -0.32 | -0.41  | 0.10  | -0.001 | 1.76      |
| mixed | BASE      | P70  | TRUE       | 97.59    | 1.00     | 96.58  | 97.44  | 200.51 | -0.28 | -0.31  | 0.08  | -0.001 | 1.09      |
| mixed | BASE      | P80  | FALSE      | 138.75   | 1.63     | 137.12 | 138.39 | 244.60 | -0.40 | -0.47  | 0.16  | -0.001 | 1.83      |
| mixed | BASE      | P80  | TRUE       | 138.75   | 1.01     | 137.75 | 138.49 | 244.89 | -0.36 | -0.37  | 0.13  | -0.001 | 1.15      |
| mixed | BASE      | P90  | FALSE      | 216.59   | 1.57     | 215.02 | 216.01 | 332.59 | -0.48 | -0.46  | 0.23  | -0.001 | 1.83      |
| mixed | BASE      | P90  | TRUE       | 216.59   | 0.94     | 215.65 | 216.20 | 332.92 | -0.42 | -0.37  | 0.18  | -0.001 | 1.12      |
| mixed | ABSORBING | ALL  | FALSE      | 28.02    | 1.17     | 26.84  | 28.49  | 103.96 | 0.01  | 0.42   | 0.00  | 0.000  | 1.17      |
| mixed | ABSORBING | ALL  | TRUE       | 28.02    | 0.57     | 27.45  | 28.15  | 104.09 | 0.06  | 0.55   | 0.00  | 0.000  | 0.56      |
| mixed | ABSORBING | P70  | FALSE      | 92.64    | 1.63     | 91.01  | 92.46  | 189.80 | -0.31 | -0.41  | 0.10  | -0.001 | 1.76      |
| mixed | ABSORBING | P70  | TRUE       | 92.64    | 1.00     | 91.64  | 92.50  | 190.04 | -0.28 | -0.30  | 0.08  | -0.001 | 1.09      |
| mixed | ABSORBING | P80  | FALSE      | 131.78   | 1.63     | 130.15 | 131.42 | 231.83 | -0.40 | -0.46  | 0.16  | -0.002 | 1.83      |

|       |            |     |       |        |      |        |        |        |       |       |      |        |      |
|-------|------------|-----|-------|--------|------|--------|--------|--------|-------|-------|------|--------|------|
| mixed | ABSORBING  | P80 | TRUE  | 131.78 | 1.01 | 130.77 | 131.52 | 232.11 | -0.36 | -0.37 | 0.13 | -0.001 | 1.15 |
| mixed | ABSORBING  | P90 | FALSE | 205.91 | 1.57 | 204.34 | 205.32 | 315.36 | -0.48 | -0.46 | 0.23 | -0.001 | 1.83 |
| mixed | ABSORBING  | P90 | TRUE  | 205.91 | 0.94 | 204.96 | 205.51 | 315.69 | -0.42 | -0.37 | 0.18 | -0.001 | 1.12 |
| mixed | WIDE_SIGMA | ALL | FALSE | 23.57  | 1.17 | 22.39  | 24.05  | 86.99  | 0.01  | 0.42  | 0.00 | 0.000  | 1.17 |
| mixed | WIDE_SIGMA | ALL | TRUE  | 23.57  | 0.57 | 23.00  | 23.70  | 87.12  | 0.06  | 0.55  | 0.00 | 0.000  | 0.56 |
| mixed | WIDE_SIGMA | P70 | FALSE | 77.92  | 1.63 | 76.29  | 77.75  | 158.83 | -0.32 | -0.41 | 0.10 | -0.002 | 1.76 |
| mixed | WIDE_SIGMA | P70 | TRUE  | 77.92  | 1.00 | 76.92  | 77.78  | 159.07 | -0.28 | -0.30 | 0.08 | -0.001 | 1.10 |
| mixed | WIDE_SIGMA | P80 | FALSE | 110.87 | 1.63 | 109.23 | 110.52 | 194.00 | -0.41 | -0.46 | 0.16 | -0.002 | 1.84 |
| mixed | WIDE_SIGMA | P80 | TRUE  | 110.87 | 1.01 | 109.86 | 110.61 | 194.29 | -0.37 | -0.37 | 0.13 | -0.001 | 1.15 |
| mixed | WIDE_SIGMA | P90 | FALSE | 173.54 | 1.57 | 171.97 | 172.96 | 264.03 | -0.48 | -0.46 | 0.23 | -0.002 | 1.84 |
| mixed | WIDE_SIGMA | P90 | TRUE  | 173.54 | 0.94 | 172.59 | 173.15 | 264.36 | -0.43 | -0.37 | 0.18 | -0.001 | 1.13 |
| mixed | SMALL_RG   | ALL | FALSE | 25.62  | 1.17 | 24.45  | 26.11  | 95.60  | 0.01  | 0.41  | 0.00 | 0.000  | 1.17 |
| mixed | SMALL_RG   | ALL | TRUE  | 25.62  | 0.57 | 25.05  | 25.76  | 95.73  | 0.06  | 0.55  | 0.00 | 0.000  | 0.56 |
| mixed | SMALL_RG   | P70 | FALSE | 84.68  | 1.63 | 83.05  | 84.54  | 174.53 | -0.32 | -0.42 | 0.10 | -0.002 | 1.76 |
| mixed | SMALL_RG   | P70 | TRUE  | 84.68  | 1.00 | 83.67  | 84.56  | 174.77 | -0.28 | -0.31 | 0.08 | -0.001 | 1.09 |
| mixed | SMALL_RG   | P80 | FALSE | 120.34 | 1.63 | 118.70 | 120.01 | 213.16 | -0.40 | -0.47 | 0.16 | -0.002 | 1.83 |
| mixed | SMALL_RG   | P80 | TRUE  | 120.34 | 1.01 | 119.33 | 120.10 | 213.45 | -0.36 | -0.37 | 0.13 | -0.001 | 1.15 |
| mixed | SMALL_RG   | P90 | FALSE | 187.50 | 1.57 | 185.93 | 186.96 | 289.73 | -0.48 | -0.46 | 0.23 | -0.001 | 1.83 |
| mixed | SMALL_RG   | P90 | TRUE  | 187.50 | 0.94 | 186.56 | 187.13 | 290.06 | -0.42 | -0.37 | 0.18 | -0.001 | 1.12 |
| mixed | LARGE_RG   | ALL | FALSE | 30.77  | 1.17 | 29.60  | 31.24  | 113.93 | 0.01  | 0.42  | 0.00 | 0.000  | 1.17 |
| mixed | LARGE_RG   | ALL | TRUE  | 30.77  | 0.57 | 30.21  | 30.90  | 114.06 | 0.06  | 0.55  | 0.00 | 0.000  | 0.56 |
| mixed | LARGE_RG   | P70 | FALSE | 101.73 | 1.63 | 100.11 | 101.53 | 208.01 | -0.32 | -0.41 | 0.10 | -0.001 | 1.76 |
| mixed | LARGE_RG   | P70 | TRUE  | 101.73 | 1.00 | 100.73 | 101.57 | 208.25 | -0.28 | -0.30 | 0.08 | -0.001 | 1.10 |
| mixed | LARGE_RG   | P80 | FALSE | 144.72 | 1.63 | 143.08 | 144.33 | 254.06 | -0.41 | -0.46 | 0.16 | -0.001 | 1.83 |
| mixed | LARGE_RG   | P80 | TRUE  | 144.72 | 1.01 | 143.71 | 144.44 | 254.35 | -0.37 | -0.37 | 0.13 | -0.001 | 1.15 |
| mixed | LARGE_RG   | P90 | FALSE | 226.28 | 1.57 | 224.71 | 225.67 | 345.62 | -0.48 | -0.46 | 0.23 | -0.001 | 1.84 |
| mixed | LARGE_RG   | P90 | TRUE  | 226.28 | 0.94 | 225.33 | 225.87 | 345.95 | -0.43 | -0.37 | 0.18 | -0.001 | 1.12 |

**Table S3: Diagnostic statistics for the Sertã wildfire period comparing simulated Smoke Optical Depth (SOD) and MERRA-2 Aerosol Optical Depth (AOD). The table lists the results for the LOWER ENVELOPE phase, for each simulation scenario, spatial mask (ALL or percentile thresholds P70), and background-subtraction condition (background, TRUE = background removed; FALSE = absolute values), the corresponding mean SOD and AOD, bias (SOD – AOD), mean absolute error (MAE), root-mean-square error (RMSE), Pearson correlation coefficient ( $r$ ) and Spearman’s rank correlation coefficient ( $\rho$ ), and coefficient of determination ( $R^2$ ) and linear-regression slope and intercept between SOD and AOD.**

| phase | scenario | mask | background | Mean SOD | Mean AOD | Bias  | MAE   | RMSE   | $r$   | $\rho$ | $R^2$ | slope  | intercept |
|-------|----------|------|------------|----------|----------|-------|-------|--------|-------|--------|-------|--------|-----------|
| mixed | BASE     | ALL  | FALSE      | 26.24    | 1.17     | 25.07 | 26.72 | 97.51  | 0.01  | 0.41   | 0.00  | 0.000  | 1.17      |
| mixed | BASE     | ALL  | TRUE       | 26.24    | 0.57     | 25.67 | 26.38 | 97.65  | 0.06  | 0.55   | 0.00  | 0.000  | 0.56      |
| mixed | BASE     | P70  | FALSE      | 86.75    | 1.63     | 85.12 | 86.59 | 178.04 | -0.31 | -0.41  | 0.10  | -0.001 | 1.76      |

|       |            |     |       |        |      |        |        |        |       |       |      |        |      |
|-------|------------|-----|-------|--------|------|--------|--------|--------|-------|-------|------|--------|------|
| mixed | BASE       | P70 | TRUE  | 86.75  | 1.00 | 85.75  | 86.62  | 178.28 | -0.28 | -0.31 | 0.08 | -0.001 | 1.09 |
| mixed | BASE       | P80 | FALSE | 123.36 | 1.63 | 121.72 | 123.01 | 217.45 | -0.40 | -0.47 | 0.16 | -0.002 | 1.83 |
| mixed | BASE       | P80 | TRUE  | 123.36 | 1.01 | 122.35 | 123.11 | 217.74 | -0.36 | -0.37 | 0.13 | -0.001 | 1.15 |
| mixed | BASE       | P90 | FALSE | 192.56 | 1.57 | 190.99 | 191.99 | 295.72 | -0.48 | -0.46 | 0.23 | -0.001 | 1.83 |
| mixed | BASE       | P90 | TRUE  | 192.56 | 0.94 | 191.61 | 192.17 | 296.04 | -0.42 | -0.37 | 0.18 | -0.001 | 1.12 |
| mixed | ABSORBING  | ALL | FALSE | 25.52  | 1.17 | 24.35  | 26.01  | 94.73  | 0.01  | 0.42  | 0.00 | 0.000  | 1.17 |
| mixed | ABSORBING  | ALL | TRUE  | 25.52  | 0.57 | 24.95  | 25.66  | 94.86  | 0.06  | 0.55  | 0.00 | 0.000  | 0.56 |
| mixed | ABSORBING  | P70 | FALSE | 84.40  | 1.63 | 82.77  | 84.23  | 172.95 | -0.31 | -0.41 | 0.10 | -0.002 | 1.76 |
| mixed | ABSORBING  | P70 | TRUE  | 84.40  | 1.00 | 83.40  | 84.27  | 173.19 | -0.28 | -0.30 | 0.08 | -0.001 | 1.09 |
| mixed | ABSORBING  | P80 | FALSE | 120.06 | 1.63 | 118.43 | 119.71 | 211.25 | -0.40 | -0.46 | 0.16 | -0.002 | 1.83 |
| mixed | ABSORBING  | P80 | TRUE  | 120.06 | 1.01 | 119.05 | 119.81 | 211.54 | -0.36 | -0.37 | 0.13 | -0.001 | 1.15 |
| mixed | ABSORBING  | P90 | FALSE | 187.59 | 1.57 | 186.02 | 187.02 | 287.39 | -0.48 | -0.46 | 0.23 | -0.001 | 1.83 |
| mixed | ABSORBING  | P90 | TRUE  | 187.59 | 0.94 | 186.65 | 187.20 | 287.72 | -0.42 | -0.37 | 0.18 | -0.001 | 1.12 |
| mixed | WIDE_SIGMA | ALL | FALSE | 22.83  | 1.17 | 21.65  | 23.32  | 84.37  | 0.01  | 0.42  | 0.00 | 0.000  | 1.17 |
| mixed | WIDE_SIGMA | ALL | TRUE  | 22.83  | 0.57 | 22.26  | 22.97  | 84.50  | 0.06  | 0.55  | 0.00 | 0.000  | 0.56 |
| mixed | WIDE_SIGMA | P70 | FALSE | 75.47  | 1.63 | 73.84  | 75.31  | 154.04 | -0.31 | -0.41 | 0.10 | -0.002 | 1.76 |
| mixed | WIDE_SIGMA | P70 | TRUE  | 75.47  | 1.00 | 74.47  | 75.34  | 154.28 | -0.28 | -0.30 | 0.08 | -0.001 | 1.09 |
| mixed | WIDE_SIGMA | P80 | FALSE | 107.39 | 1.63 | 105.75 | 107.04 | 188.15 | -0.40 | -0.46 | 0.16 | -0.002 | 1.83 |
| mixed | WIDE_SIGMA | P80 | TRUE  | 107.39 | 1.01 | 106.38 | 107.14 | 188.44 | -0.37 | -0.37 | 0.13 | -0.001 | 1.15 |
| mixed | WIDE_SIGMA | P90 | FALSE | 168.01 | 1.57 | 166.43 | 167.44 | 256.05 | -0.48 | -0.46 | 0.23 | -0.002 | 1.84 |
| mixed | WIDE_SIGMA | P90 | TRUE  | 168.01 | 0.94 | 167.06 | 167.62 | 256.38 | -0.43 | -0.37 | 0.18 | -0.001 | 1.12 |
| mixed | SMALL_RG   | ALL | FALSE | 21.48  | 1.17 | 20.31  | 21.99  | 80.04  | 0.01  | 0.41  | 0.00 | 0.000  | 1.17 |
| mixed | SMALL_RG   | ALL | TRUE  | 21.48  | 0.57 | 20.91  | 21.63  | 80.16  | 0.06  | 0.55  | 0.00 | 0.000  | 0.56 |
| mixed | SMALL_RG   | P70 | FALSE | 71.00  | 1.63 | 69.37  | 70.88  | 146.12 | -0.31 | -0.41 | 0.10 | -0.002 | 1.76 |
| mixed | SMALL_RG   | P70 | TRUE  | 71.00  | 1.00 | 70.00  | 70.90  | 146.36 | -0.28 | -0.31 | 0.08 | -0.001 | 1.09 |
| mixed | SMALL_RG   | P80 | FALSE | 100.92 | 1.63 | 99.29  | 100.62 | 178.47 | -0.40 | -0.47 | 0.16 | -0.002 | 1.83 |
| mixed | SMALL_RG   | P80 | TRUE  | 100.92 | 1.01 | 99.91  | 100.70 | 178.76 | -0.36 | -0.37 | 0.13 | -0.001 | 1.15 |
| mixed | SMALL_RG   | P90 | FALSE | 157.33 | 1.57 | 155.76 | 156.81 | 242.64 | -0.48 | -0.46 | 0.23 | -0.002 | 1.83 |
| mixed | SMALL_RG   | P90 | TRUE  | 157.33 | 0.94 | 156.38 | 156.97 | 242.97 | -0.42 | -0.37 | 0.18 | -0.001 | 1.12 |
| mixed | LARGE_RG   | ALL | FALSE | 28.84  | 1.17 | 27.66  | 29.31  | 106.85 | 0.01  | 0.42  | 0.00 | 0.000  | 1.17 |
| mixed | LARGE_RG   | ALL | TRUE  | 28.84  | 0.57 | 28.27  | 28.97  | 106.98 | 0.06  | 0.55  | 0.00 | 0.000  | 0.56 |
| mixed | LARGE_RG   | P70 | FALSE | 95.34  | 1.63 | 93.71  | 95.15  | 195.09 | -0.31 | -0.41 | 0.10 | -0.001 | 1.76 |
| mixed | LARGE_RG   | P70 | TRUE  | 95.34  | 1.00 | 94.34  | 95.19  | 195.33 | -0.28 | -0.30 | 0.08 | -0.001 | 1.09 |
| mixed | LARGE_RG   | P80 | FALSE | 135.63 | 1.63 | 133.99 | 135.25 | 238.28 | -0.40 | -0.46 | 0.16 | -0.001 | 1.83 |
| mixed | LARGE_RG   | P80 | TRUE  | 135.63 | 1.01 | 134.62 | 135.36 | 238.57 | -0.37 | -0.37 | 0.13 | -0.001 | 1.15 |
| mixed | LARGE_RG   | P90 | FALSE | 211.99 | 1.57 | 210.42 | 211.40 | 324.15 | -0.48 | -0.46 | 0.23 | -0.001 | 1.84 |
| mixed | LARGE_RG   | P90 | TRUE  | 211.99 | 0.94 | 211.05 | 211.59 | 324.48 | -0.42 | -0.37 | 0.18 | -0.001 | 1.12 |
